# Supplementary material for: Mechanisms of Transmission Ratio Distortion at Hybrid Sterility Loci Within and Between Mimulus Species
Source: Oxford University Press journal article supplement (doi:10.1534/g3.117.300148), 2017-09-21
Supplement: 300148_figures1.pdf [file 300148_figures1.pdf]

Figure S1

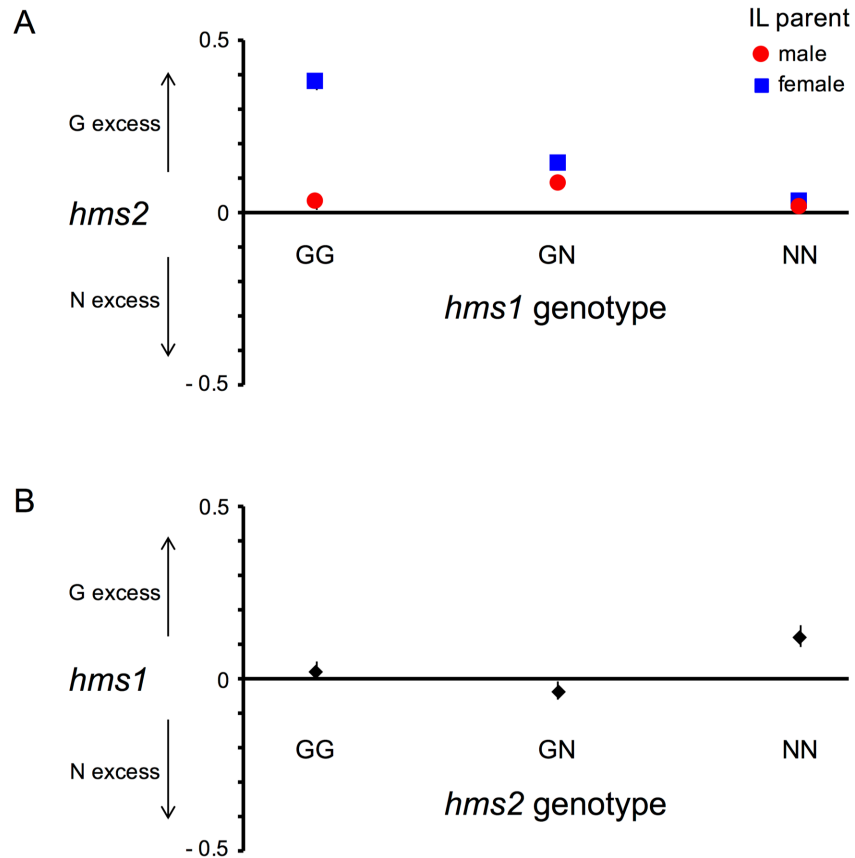

Figure S1. Transmission ratio distortion at *hms1* and *hms2* in IL-backcross progeny. The vertical position of each symbol shows the magnitude and direction of the deviation of allelic transmission from the Mendelian expectation (0.5). *M. guttatus* deviations are graphed directly [deviation =  $f(N - 0.5)$ ], and the *M. nasutus* deviations are graphed as negative [deviation =  $- (f(N-0.25))$ ]. Thus, values above zero indicate excess of *M. guttatus* alleles and values below zero indicate excess of *M. nasutus* alleles. G = *M. guttatus* allele, N = *M. nasutus* allele. A) Allelic transmission of *hms2* in the progeny of IL-backcrosses is significantly affected by IL parental genotype at *hms1* ( $F = 37.6919$ ,  $P < 0.0001$ ), cross direction ( $F = 72.3339$ ,  $P < 0.0001$ ), and their interaction ( $F = 31.8353$ ,  $P < 0.0001$ ). B) Allelic transmission of *hms1* in the progeny of IL-backcrosses is significantly affected by IL parental genotype at *hms1* ( $F = 7.7977$ ,  $P = 0.0043$ ).
